# Supplementary material for: Concentrated Solar Induced Graphene
Source: PubMed Central journal article supplement — ACS Omega. 2022 Jul 31;7(31):27263–71. doi: 10.1021/acsomega.2c02159 (PMC9366939; doi:10.1021/acsomega.2c02159), 2022-07-31
Supplement: ao2c02159_si_001.pdf [file ao2c02159_si_001.pdf]

# Supporting Information

## Concentrated Solar Induced Graphene

Xiao-Hua Hu,<sup>†</sup> Rui Zhang,<sup>†</sup> Zhiyong Wu, Shisheng Xiong<sup>\*</sup>

School of Information Science and Technology, Fudan University, 220 Handan Road, Shanghai  
200433, China

### <sup>†</sup>**Co-first Authors**

Xiao-Hua Hu and Rui Zhang contributed equally to this work.

### <sup>\*</sup>**Corresponding Author**

Shisheng Xiong

E-mail: [sxiong@fudan.edu.cn](mailto:sxiong@fudan.edu.cn)

# Contents

|                         |      |
|-------------------------|------|
| <b>Figure S1</b> .....  | S-3  |
| <b>Figure S2</b> .....  | S-4  |
| <b>Figure S3</b> .....  | S-5  |
| <b>Figure S4</b> .....  | S-6  |
| <b>Table S1</b> .....   | S-6  |
| <b>Figure S5</b> .....  | S-7  |
| <b>Table S2</b> .....   | S-7  |
| <b>Figure S6</b> .....  | S-8  |
| <b>Figure S7</b> .....  | S-9  |
| <b>Figure S8</b> .....  | S-10 |
| <b>Figure S9</b> .....  | S-11 |
| <b>References</b> ..... | S-12 |

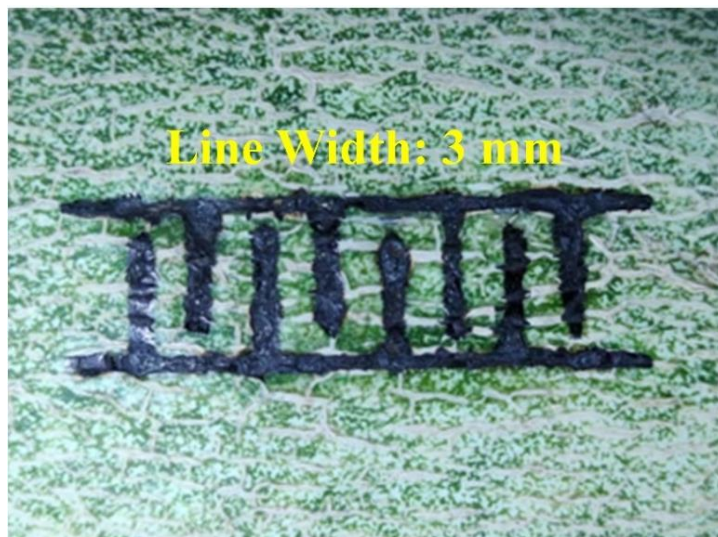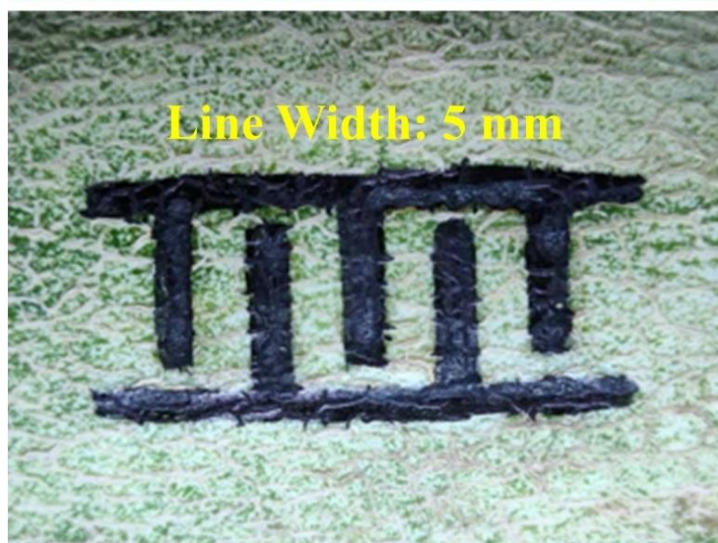

**Figure S1.** Photograph of graphene patterned into a shape of the interdigital electrodes on cantaloupe peels by using concentrated solar radiation. Top: 8 interdigital electrodes with a line width of ~3 mm. Down: 5 interdigital electrodes with a line width of ~5 mm.

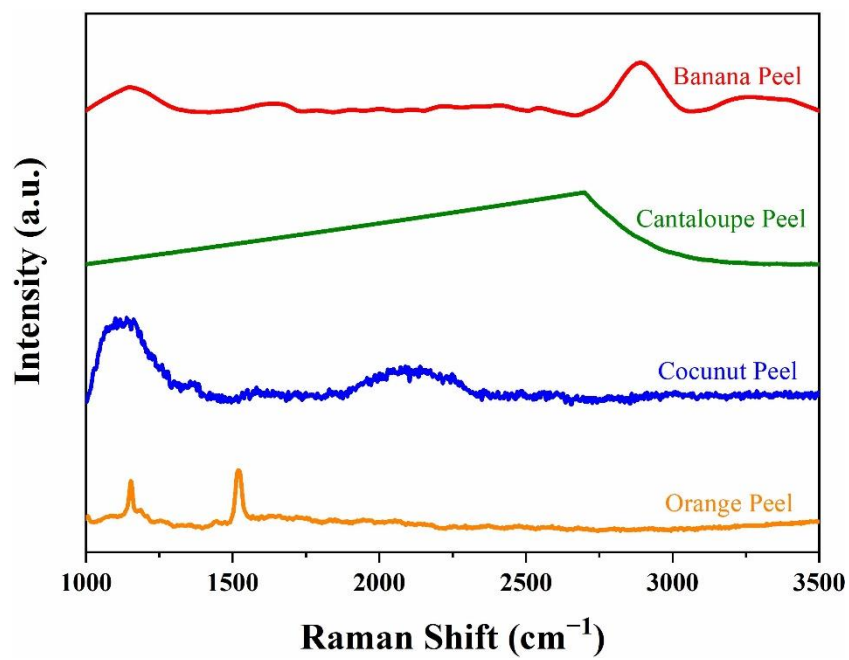

**Figure S2.** Raman spectra of four different carbon sources: banana peel, cantaloupe peel, coconut peel, and orange peel.

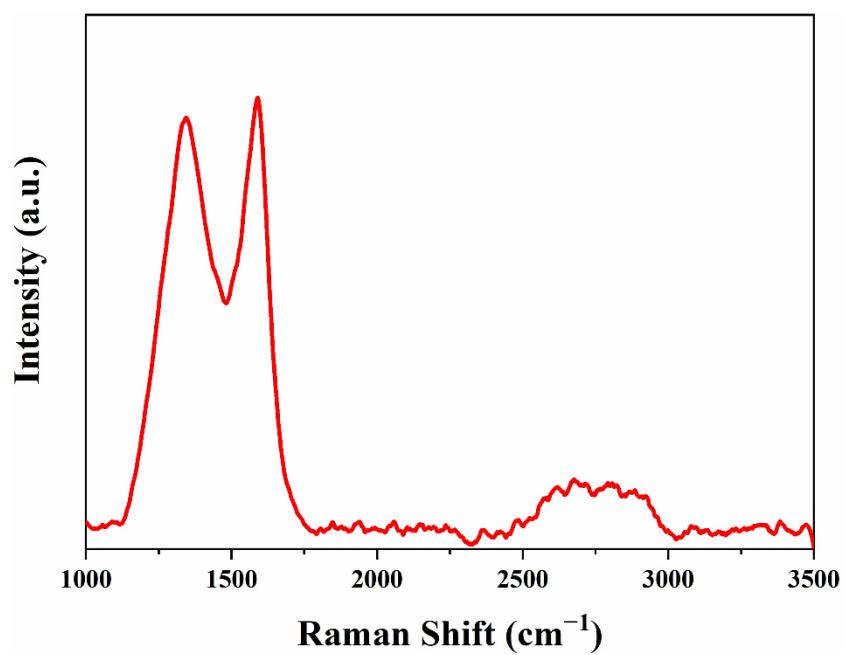

Figure S3. Raman spectrum of CSIG from PI film.

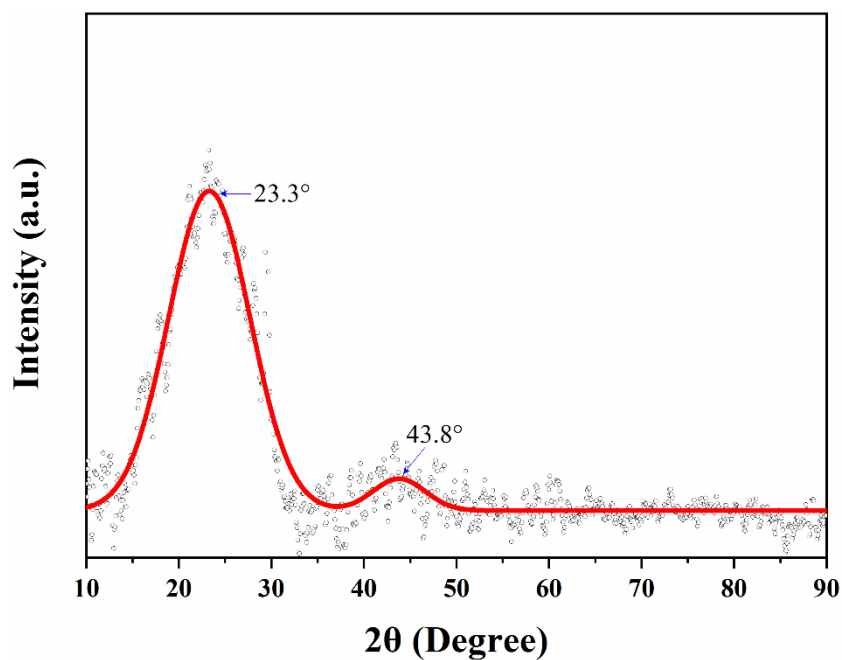

**Figure S4.** XRD pattern of CSIG from banana peels.

**Table S1.** Gauss fitting parameter of two peaks in XRD pattern (**Figure S4**) of CSIG.

| Model                             | Gauss                                                                              |                    |
|-----------------------------------|------------------------------------------------------------------------------------|--------------------|
| <b>Equation</b>                   | $y = y_0 + (A / (w \times \sqrt{\pi/2})) \times \exp(-2 \times ((x - x_c) / w)^2)$ |                    |
| <b>Parameters</b>                 | <b>Peak I</b>                                                                      | <b>Peak II</b>     |
| $x_c$                             | $23.30 \pm 0.05$                                                                   | $43.81 \pm 0.42$   |
| $A$                               | $1969.54 \pm 24.42$                                                                | $125.84 \pm 18.37$ |
| $y_0$                             | $1.37 \pm 0.60$                                                                    | $1.37 \pm 0.60$    |
| $w$                               | $8.77 \pm 0.11$                                                                    | $5.63 \pm 0.87$    |
| <i>Height</i>                     | $179.15 \pm 1.88$                                                                  | $17.82 \pm 2.32$   |
| <i>Full Width at Half Maximum</i> | $10.33 \pm 0.131$                                                                  | $6.63 \pm 1.03$    |
| <i>Sigma</i>                      | $4.39 \pm 0.06$                                                                    | $2.82 \pm 0.44$    |

**Notice:**  $x_c$  is the center of the peak.  $A$  is the area under the peak.  $y_0$  is the baseline offset.  $w$  equals 2 times the standard deviation of the Gaussian distribution ( $2 \times s$ ) or approximately 0.849 the width of the peak at half height.  $\pi$  is the ratio of circumference to diameter, i.e., 3.141592654.

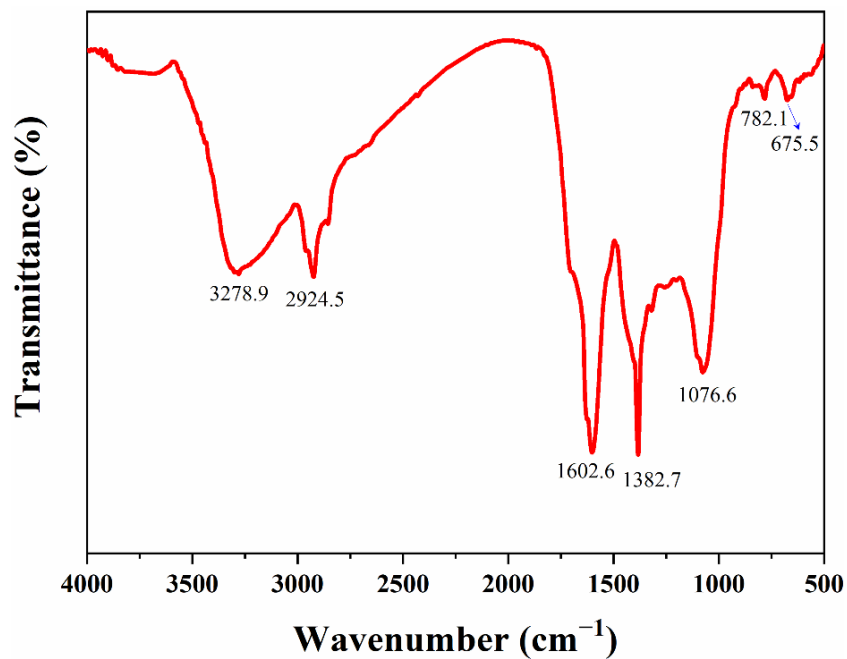

**Figure S5.** FT-IR spectrum of CSIG from banana peels.

**Table S2.** Assignment of the bands observed in FT-IR spectrum (**Figure S5**) of CSIG.

| Wavenumber (cm <sup>-1</sup> ) | Vibrational Mode                           | Transmittance |
|--------------------------------|--------------------------------------------|---------------|
| ~3278.9                        | O–H stretching <sup>1</sup>                | 68.9%         |
| ~2924.5                        | C–H stretching <sup>2</sup>                | 68.6%         |
| ~1602.6                        | C=C stretching <sup>2</sup>                | 50.4%         |
| ~1382.7                        | C–H bending <sup>3</sup>                   | 50.2%         |
| ~1076.6                        | C–O stretching <sup>3</sup>                | 58.7%         |
| ~782.1                         | out-of-plane C–H ring bending <sup>4</sup> | 87.1%         |
| ~675.5                         | $\nu_{11}$ mode of benzene <sup>4,5</sup>  | 86.8%         |

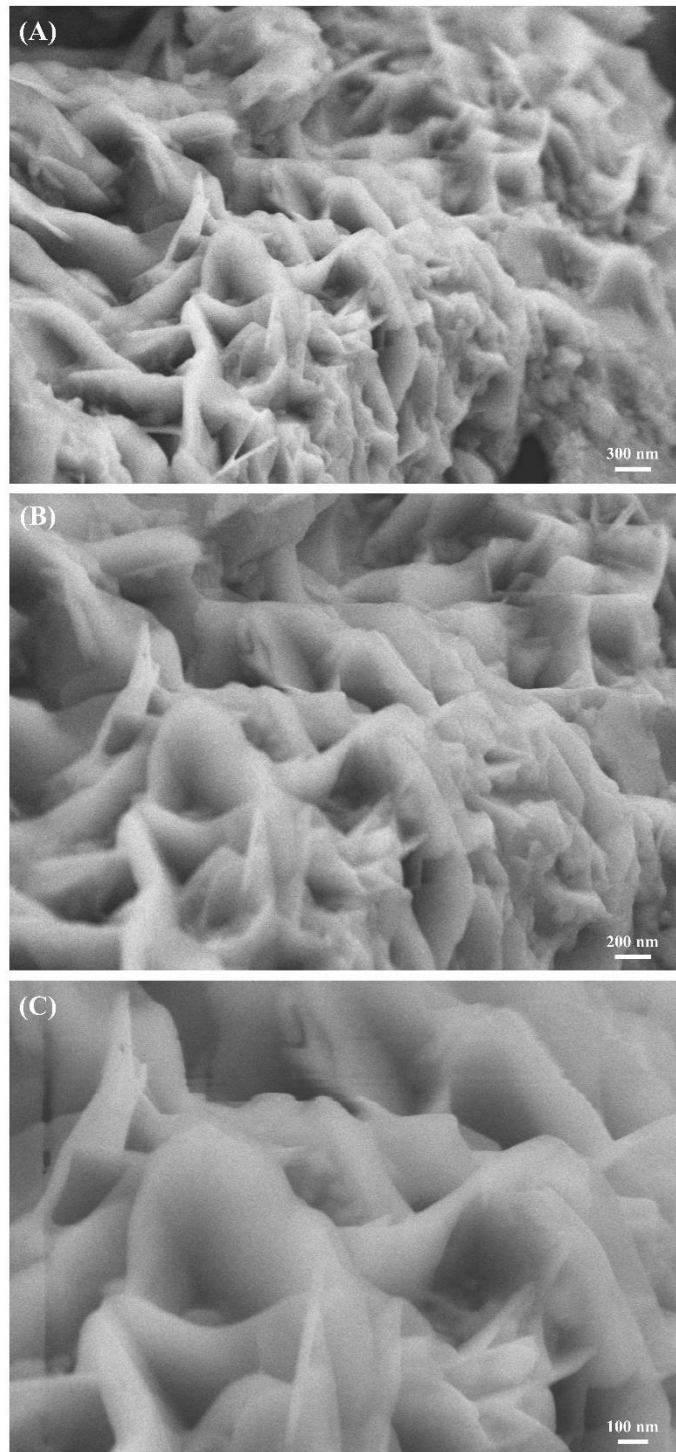

**Figure S6.** SEM images of CSIG from banana peels at (A) 20 k, (B) 30 k, and (C) 50 k magnifications.



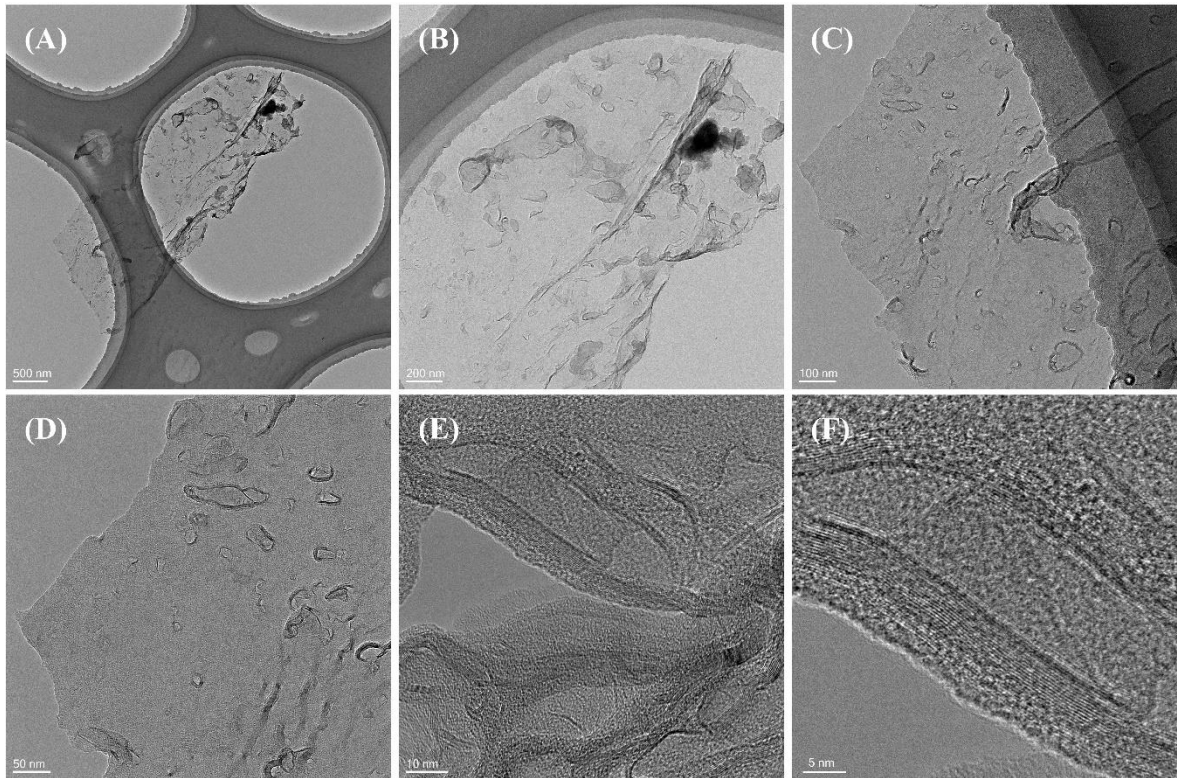

**Figure S7.** TEM images of CSIG from banana peels at (A) 10 k, (B) 25 k, (C) 50 k, (D) 100 k, (E) 500 k, and (F) 1000 k magnifications.

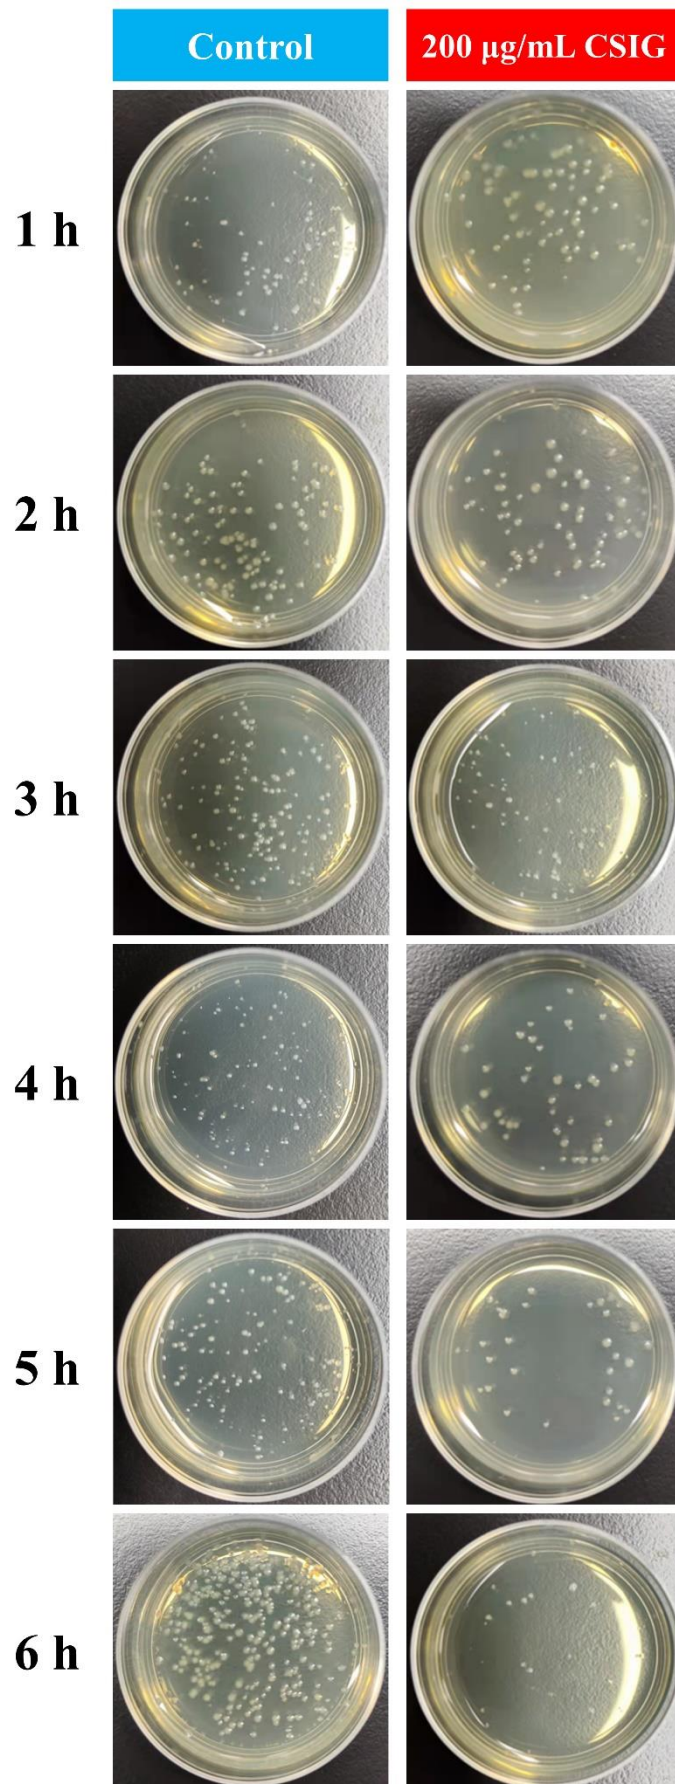

**Figure S8.** Photographs showing the bacterial culture plates of *E. coli* incubated without CSIG, and with 200  $\mu\text{g}/\text{mL}$  CSIG exposure for 1, 2, 3, 4, 5, and 6 h.

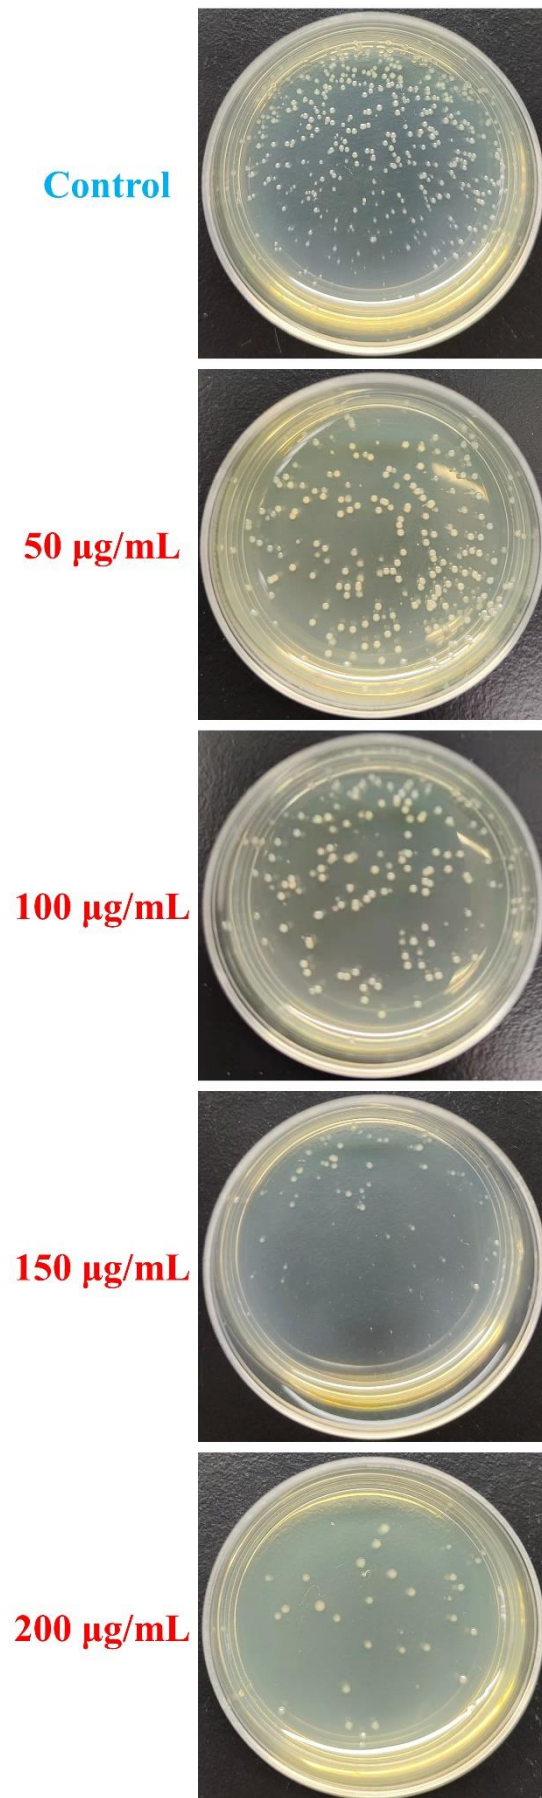

**Figure S9.** Photographs showing the bacterial culture plates of *E. coli* upon a 6 h exposure to the control (without CSIG) and four different concentrations of CSIG dispersion.

## REFERENCES

- (1) Ain, N. u.; Anis, I.; Ahmed, F.; Shah, M. R.; Parveen, S.; Faizi, S.; Ahmed, S. Colorimetric Detection of Amoxicillin Based on Quercetageitin Coated Silver Nanoparticles. *Sens. Actuators B Chem.* **2018**, *265*, 617-624.
- (2) Pandey, S.; Karakoti, M.; Surana, K.; Dhapola, P. S.; SanthiBhushan, B.; Ganguly, S.; Singh, P. K.; Abbas, A.; Srivastava, A.; Sahoo, N. G. Graphene Nanosheets Derived from Plastic Waste for the Application of DSSCs and Supercapacitors. *Sci. Rep.* **2021**, *11*, 3916.
- (3) Pandey, S.; Kumar, A.; Karakoti, M.; Garg, K. K.; Rana, A.; Tatrari, G.; Bohra, B. S.; Yadav, P.; Singh, R. K.; Sahoo, N. G. 3D Graphene Nanosheets from Plastic Waste for Highly Efficient HTM Free Perovskite Solar Cells. *Nanoscale Adv.* **2021**, *3*, 4726-4738.
- (4) Heglund, D. L.; Tilotta, D. C. Determination of Volatile Organic Compounds in Water by Solid Phase Microextraction and Infrared Spectroscopy. *Environ. Sci. Technol.* **1996**, *30*, 1212-1219.
- (5) Ciabini, L.; Santoro, M.; Bini, R.; Schettino, V. High Pressure Reactivity of Solid Benzene Probed by Infrared Spectroscopy. *J. Chem. Phys.* **2002**, *116*, 2928-2935.
